# Supplementary material
Source: Research Square preprint supplement (doi:10.21203/rs.3.rs-9479406/v1)
Supplement: Supplementary file 1 [file bbde112de8d98f039417ca5c.docx]

**Appendix A. Supplementary data**

CCDC 2541378 (**1**), 2541379 (**2**), 2541380 (**3**) and 2541381 (**4**) contain the supplementary crystallographic data for the complexes. These data can be obtained free of charge via http://www.ccdc.cam.ac.uk/conts/retrieving.html, or from the Cambridge Crystallographic Data Centre, 12 Union Road, Cambridge CB2 1EZ, UK; fax: (+44)1223-336-033; or e-mail: deposit@ccdc.cam.ac.uk.
